# Supplementary material
Source: publisher figshare collection journal article supplement (https://diabetesjournals.figshare.com/articles/dataset/_/26240234)
Supplement: Supplementary file 1 [file 2]

**Supplemental Table S1: Continuous glucose monitoring metrics at baseline for persistent multiple islet autoantibody positive (PM Ab+) and age and sex matched islet autoantibody negative (Ab-) children by day and night time periods, presented as median [lower quartile, upper quartile]**

|                                        | <b>Persistent multiple islet<br/>autoantibody positive<br/>children<br/>(PM Ab+)<br/>N=30</b> | <b>Islet autoantibody<br/>negative children<br/>(Ab-)<br/>N=23</b> |
|----------------------------------------|-----------------------------------------------------------------------------------------------|--------------------------------------------------------------------|
| <b>DAY TIME (6AM – 10PM)</b>           |                                                                                               |                                                                    |
| <b>SD sensor glucose level (SDSGL)</b> |                                                                                               |                                                                    |
| (mmol/L)                               | 1.2 [1.0, 1.4]                                                                                | 0.9 [0.8, 1.0]                                                     |
| (mg/dL)                                | 21.6 [18.0, 25.2]                                                                             | 16.2 [14.4, 18.0]                                                  |
| <b>Coefficient variation (CEV) (%)</b> | 17.6 [17.0, 20.9]                                                                             | 14.8 [13.4, 16.8]                                                  |
| <b>Mean sensor glucose level (SGL)</b> |                                                                                               |                                                                    |
| (mmol/L)                               | 6.3 [6.0, 6.9]                                                                                | 6.1 [5.7, 6.5]                                                     |
| (mg/dL)                                | 113.4 [108.0, 124.2]                                                                          | 109.8 [102.6, 117.0]                                               |
| <b>% CGM time spent</b>                |                                                                                               |                                                                    |
| 3.9 – 7.8 mmol/L (70 - 140mg/dL)       | 88.2 [80.2, 94.2]                                                                             | 94.0 [91.8, 97.3]                                                  |
| >7.8 mmol/L (>140mg/dL)                | 11.3 [5.6, 18.5]                                                                              | 4.4 [1.9, 7.6]                                                     |
| >8.9 mmol/L (>160 mg/dL)               | 3.0 [1.4, 7.0]                                                                                | 0.8 [0.3, 1.6]                                                     |
| >10.0 mmol/L (>180 mg/dL)              | 0.9 [0.1, 2.8]                                                                                | 0.1 [0, 0.5]                                                       |
| >11.1 mmol/L (>200 mg/dL)              | 0.3 [0, 1.2]                                                                                  | 0 [0, 0]                                                           |
| <3.9 mmol/L (<70 mg/dL)                | 0.3 [0.1, 0.8]                                                                                | 0.1 [0, 0.3]                                                       |
| <3.5 mmol/L (<63 mg/dL)                | 0.1 [0, 0.3]                                                                                  | 0 [0, 0.1]                                                         |
| <3.0 mmol/L (<54 mg/dL)                | 0 [0, 0.1]                                                                                    | 0 [0, 0]                                                           |
| <b>NIGHT TIME (10PM – 6AM)</b>         |                                                                                               |                                                                    |
| <b>SD sensor glucose level (SDSGL)</b> |                                                                                               |                                                                    |
| (mmol/L)                               | 0.8 [0.7, 1.0]                                                                                | 0.7 [0.6, 0.8]                                                     |
| (mg/dL)                                | 14.4 [12.6, 18.0]                                                                             | 12.6 [10.8, 14.4]                                                  |
| <b>Coefficient variation (CEV) (%)</b> | 14.1 [11.6, 17.4]                                                                             | 11.8 [10.3, 14.9]                                                  |
| <b>Mean sensor glucose level (SGL)</b> |                                                                                               |                                                                    |
| (mmol/L)                               | 5.9 [5.4, 6.4]                                                                                | 5.8 [5.6, 5.9]                                                     |
| (mg/dL)                                | 106.2 [97.2, 115.2]                                                                           | 104.4 [100.8, 106.2]                                               |
| <b>% CGM time spent</b>                |                                                                                               |                                                                    |
| 3.9 – 7.8 mmol/L (70 - 140mg/dL)       | 95.9 [92.3, 98.4]                                                                             | 98.2 [94.9, 98.9]                                                  |
| >7.8 mmol/L (>140mg/dL)                | 1.8 [0.5, 6.5]                                                                                | 1.2 [0.3, 1.8]                                                     |
| >8.9 mmol/L (>160 mg/dL)               | 0.3 [0, 1.0]                                                                                  | 0 [0, 0.2]                                                         |
| >10.0 mmol/L (>180 mg/dL)              | 0 [0, 0.3]                                                                                    | 0 [0, 0]                                                           |
| >11.1 mmol/L (>200 mg/dL)              | 0 [0, 0]                                                                                      | 0 [0, 0]                                                           |
| <3.9 mmol/L (<70 mg/dL)                | 0.5 [0, 1.0]                                                                                  | 0.1 [0, 1.3]                                                       |
| <3.5 mmol/L (<63 mg/dL)                | 0.1 [0, 0.3]                                                                                  | 0 [0, 0.5]                                                         |
| <3.0 mmol/L (<54 mg/dL)                | 0 [0, 0.1]                                                                                    | 0 [0, 0.2]                                                         |
