# Supplementary material
Source: publisher figshare collection journal article supplement (https://diabetesjournals.figshare.com/articles/dataset/_/26240234)

**Supplemental Figure S1:** A. Standard deviation sensor glucose (SD SGL); B. Coefficient variation (CEV SGL); C. Mean sensor glucose (Mean SGL) and D. Percent time >7.8 mmol/mol (140 mg/dL) by age at time of first islet autoantibody detection and duration at time of CGM

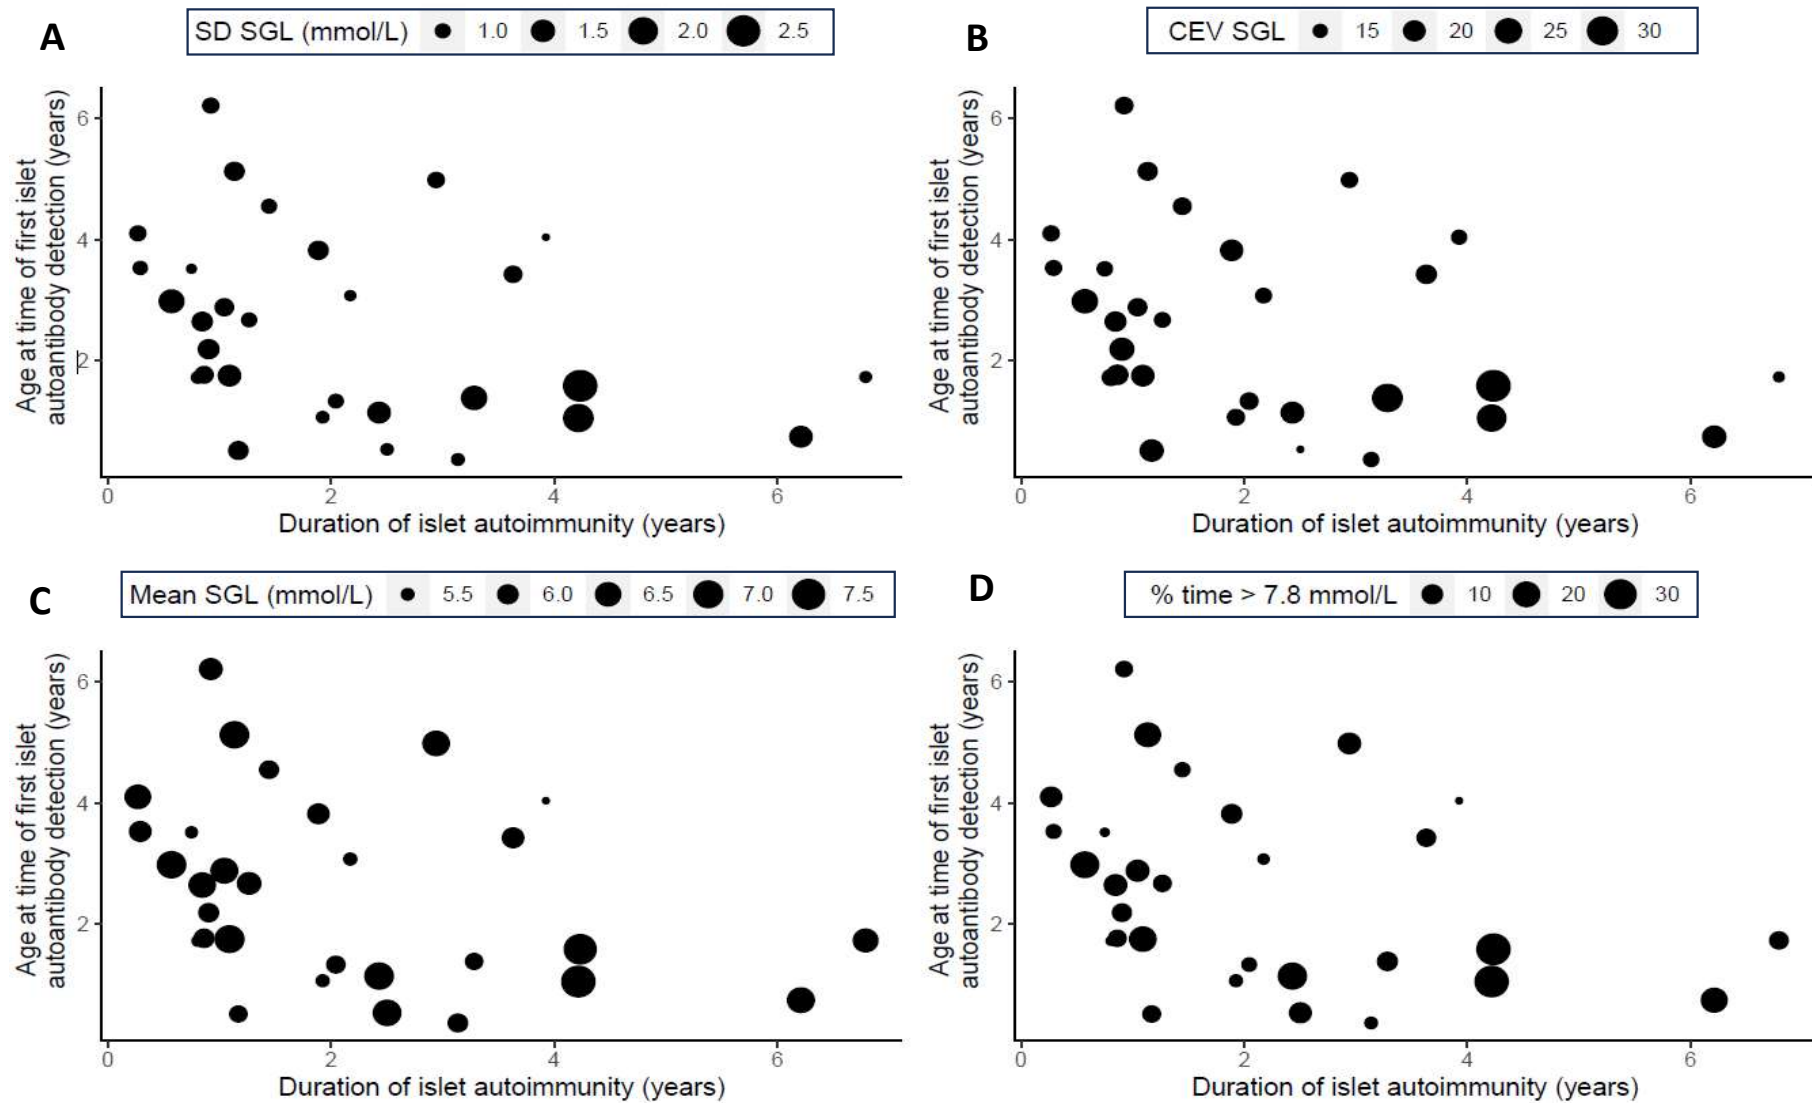

Supplement: Supplementary file 2 [file 2]
